# Supplementary material
Source: publisher figshare collection journal article supplement (https://future-science-group.figshare.com/articles/dataset/_/24085344)
Supplement: Supplementary file 1 [file 1]

## Sheet: Sheet2
DEGs	logFC
RBM5	-0.566695
MAFF	2.31804
FHL1	-0.678179
MAPRE2	-0.832493
TRAF3IP3	-0.789295
G0S2	3.1057
SNX1	-0.600221
IL27RA	-0.709353
VPS13D	-0.352816
F13A1	-1.39586
PLAUR	0.787955
SIK1	1.6266
KIAA0907	-0.741491
ATF3	1.07062
STX7	-0.704781
DUSP2	1.37185
PHKB	-0.630605
RNF44	-0.672966
CDYL	-0.547628
IL16	-0.843335
CD83	1.51335
DUSP4	1.11935
ZNF623	-0.561154
ALDH5A1	-0.627288
MECP2	-0.615159
DIDO1	-0.457967
GTF2H1	-0.503097
IFI27	1.8963
SETX	-0.876675
BPTF	-0.594114
ESYT1	-1.08598
LINC00847	-0.44849
LRBA	-0.541953
ATM	-0.485669
SSBP2	-0.735588
CCS	-0.346007
RGS14	-0.604928
MORC2	-0.460074
IL6	2.00944
RBM6	-0.71314
MACF1	-0.440796
LUC7L3	-1.07671
SLC2A3	0.9596
TCL1A	-1.44795
SERPING1	1.53177
BRD8	-0.321237
LRRN3	-1.75724
FCER1A	-0.846738
MARCO	0.562689
UBR2	-0.472109
METTL3	-0.531143
NSUN5P2///NSUN5P1	-0.702711
IFI44	1.31382
TRAF5	-0.435818
ZNF248	-0.340107
TCFL5	-0.555957
NR4A1	0.434011
MTSS1	-0.767144
SPOP	-0.534401
LDLRAD4	-0.324334
CDKN1A	0.90142
IL1B	1.67759
IGHV5-78	-0.445676
PPP1R15A	1.03885
RGS1	2.27806
MLH3	-0.682307
CLK2	-0.517137
CTGF	-0.375014
STAT6	-0.438053
CREM	0.668058
CITED2	-0.706428
CD1C	-0.559227
MT1E	0.455077
FTO	-0.859298
CXCL8	2.45431
TNFAIP3	1.16174
EPHX2	-0.499364
APOBEC3B	1.42462
GNAZ	-0.490797
ACTR2	-0.681472
STK38	-0.503743
SAR1A	0.653516
IFI44L	1.64171
S1PR4	-0.52212
NFIL3	1.39481
CUL4B	-0.529289
ADARB1	-0.541665
HSPA5	0.710361
DOPEY2	-0.314015
TRBC1	-0.789039
VPS13B	-0.383213
RTN1	-0.707174
SKAP1	-0.622585
GADD45B	0.477616
MIR6872///SEMA3B	0.298951
NFATC3	-0.504944
SLC7A5	0.988407
RRP1B	-0.568646
CAT	-0.882815
ZNF175	-0.293624
GRAP2	-0.583416
PDHB	-0.739623
NEK9	-0.435052
LDLR	0.310106
KIF2A	-0.65448
PAFAH1B1	-0.456603
PAN2	-0.477288
RABIF	-0.302433
GABARAPL1	1.28633
RPA1	-0.664946
BCL2A1	1.3616
NRGN	-1.13038
LOC103344931	-0.481487
IVNS1ABP	-0.340942
SDR39U1	-0.478992
CDC16	-0.622461
NINJ1	0.942185
MT1H	0.471036
NFKBIA	1.49152
EIF2AK2	0.615004
AFP	0.336925
CYP2J2	0.249579
DYNLL1	-1.14204
SMAD3	0.487449
DPYD	-0.819921
AKAP9	-0.351928
TIPARP	0.818546
PPBP	-1.76553
DDIT3	0.950785
CKAP4	0.581644
NUP160	-0.452674
MAN2B2	-0.388998
MFAP3L	-0.692974
ALDH6A1	-0.299773
CBX7	-0.442671
AQR	-0.437869
SLC35E2B///SLC35E2	-0.674864
TRIB2	-0.742726
CTRL	0.597688
MBNL1	-0.537412
SNX19	-0.384506
STK17B	1.23341
AXL	0.365452
AREG	0.641271
ABLIM1	-0.650143
AHSA2	-0.82762
TMEM63A	-0.391522
SYPL1	-0.567744
ATG2A	0.444427
RELB	0.584225
SLC12A1	0.232698
ACTN1	-0.625758
INPP5E	-0.412215
CXCL2	1.83956
GPR18	-0.837659
YWHAB	-0.521355
ARHGEF18	-0.687708
SGTA	0.320932
MIR22///MIR22HG	1.03259
RALBP1	-0.794245
CD69	1.30751
KIFC1	0.313836
HNRNPA0	-0.801418
SPARC	-0.977164
LEF1	-0.807808
ARPC5	-0.811971
SP3	-0.517002
PYCR1	0.267225
FBLN5	-0.466774
WDR1	-0.297644
NR4A2	0.923833
CCR7	-0.993908
EPRS	-0.415535
IL4R	-0.557502
DLEU1	-0.742345
IER3	1.17963
ARHGAP11A	0.300141
SKAP2	-0.97175
BIRC3	-0.842399
DHX16	-0.476321
FLI1	-0.711605
FAM208A	-0.538688
PTPRC	-0.645126
LPXN	-0.642455
GGPS1	-0.42793
ENDOD1	-0.448825
ADCY7	-0.603597
BMX	0.460802
HIST2H2AA4///HIST2H2AA3	0.713714
CCT5	-0.5503
CCNG2	-0.555444
GCHFR	0.304491
IL7R	-1.34881
GADD45A	0.634236
ATXN2	-0.381334
CDK16	0.268216
UPP1	0.854737
SWAP70	-0.896009
AHSA1	-0.507919
ARID5A	0.739105
POGZ	-0.348688
TNFAIP8	-0.691817
PARP1	-0.617889
AP2B1	-0.376682
CTDSP2	-0.312817
IDI1	0.539394
IDS	0.425896
FAM32A	-0.266731
CLNS1A	-0.73465
PPIF	0.455478
ARHGEF6	-0.596201
TGM2	0.351059
STK10	-0.285367
ASXL1	-0.566175
CTSL	0.749506
HBEGF	0.822869
PF4	-1.09576
SLC35A1	-0.816905
ATP6V1D	-0.544895
CX3CR1	-1.32876
USP24	-0.359576
DUSP5	0.74631
CCL20	0.72101
RHOBTB1	-0.425039
CD3D	-0.707933
NR1I3	0.220919
TARP///TRGV9///TRGC2	-0.866708
HIVEP2	-0.619952
FNTA	-0.493606
CIR1	0.564276
TGFBR2	-0.518292
LY6E	0.881821
IFITM3	0.701926
NELL2	-0.75789
TIAM1	-0.339708
GP5	-0.23012
OGT	-0.511646
ZNF271P	-0.387215
GLS	-0.465744
RSL1D1	-0.330494
SMAD4	-0.350346
DRAP1	0.399103
NR4A3	0.3679
AKR7A2	-0.593111
UBE2S	0.656512
TUBGCP3	-0.585653
CD48	-0.390603
NFKBIB	0.227862
HADHA	-0.378186
MAEA	-0.323532
SEPP1	0.227619
ADM	1.40491
ATAD2B	-0.329363
GNG11	-1.16818
SACM1L	-0.87943
FAM50B	-0.45363
MGA	-0.393623
KLRC4-KLRK1///KLRK1	-0.549057
CHI3L2	-0.572738
CD72	-0.418524
CD2	-0.689478
CBX1	-0.699327
HSD17B4	-0.581638
DDX23	-0.399592
ICAM1	0.57864
PRRC2B	-0.334604
BLCAP	-0.50812
IER2	0.301843
BTG3	0.493967
NFKBIE	0.439229
MYLK	-0.370111
PCBP1	-0.462036
ADAM20	0.24378
ZMYND11	-0.371374
ATP1B2	0.260044
PTGS2	0.774499
EED	-0.493579
ZDHHC18	0.367109
PLK2	0.264418
RAPGEF2	0.491382
ARHGDIB	-0.489189
MIR4640///DDR1	-0.198938
CYFIP2	-0.468392
MPHOSPH10	-0.503786
CDO1	0.190444
ADRB2	-0.786812
FLII	-0.306699
DDX46	-0.407411
EDRF1	-0.489716
VPS72	-0.295789
UMPS	-0.26061
RGL2	-0.516466
SH3BP5	-0.443203
PRUNE1	-0.247448
C5orf45	0.198796
SNAPC5	-0.480605
IL11RA	-0.430515
ATF4	0.510651
WASF1	-0.288285
MMS19	-0.335004
PRPSAP1	-0.377643
PEX3	-0.571636
GRHPR	-0.396037
EPHB1	0.28765
CCL2	1.07834
MBD4	-0.635271
GPM6B	0.28074
CD1D	-0.581845
TMSB4X	-0.208427
APOM	0.268905
KCNQ1	0.21787
SUN1	-0.421664
ACAA1	-0.236648
UBE2C	0.579426
PIGF	-0.672929
FMO5	-0.184923
NCAPH2	0.22288
FTH1	0.428356
KBTBD11	-0.336309
GPR176	0.24196
HERC2P9///HERC2P2	-0.75162
CD96	-0.594482
CHRNA2	0.230796
EIF4B	-0.424265
BCL11A	-0.587026
ZIC1	0.189706
ALDH3A2	-0.576211
MAPKAPK2	0.309933
CALR	0.265258
LRPPRC	-0.487792
DAXX	-0.310587
STMN2	0.304764
GNRHR	0.204402
C15orf39	0.362287
VEGFA	0.507227
MT1G	0.395526
ACTG1///ACTB	-0.656501
LOC101928830///LTA4H	-0.855493
COG4	-0.263813
SLC7A6	-0.465564
HOXA5	0.474107
DYNC1I2	-0.427705
HAGH	-0.383349
JAK1	-0.276179
EIF3CL///EIF3C	-0.590909
CDC45	0.432639
SIT1	-0.412368
LY9	-0.505156
ITPKB	-0.463688
HBB	-1.64174
GPKOW	-0.251361
PRKDC	-0.271882
SMC1A	-0.292585
CXCL3	0.851034
GNA15	0.813944
ALDH1B1	0.18783
ATP6V0C	0.350072
RAB5C	0.287208
PUM2	-0.321232
LAT	-0.562635
ZHX2	-0.312302
APBB2	0.22864
GC	0.210441
CD9	-0.436928
ATP8A2	0.219396
PTGDS	0.529874
IGFBP4	0.282398
TSPAN3	-0.351996
ISG15	1.10023
DOCK9	-0.387231
FEM1B	-0.560636
NSL1	-0.249306
CREBZF	-0.327634
ZNF217	-1.00002
SPECC1L	-0.24531
RASA1	-0.692804
TRIP10	0.302628
CALML3	0.236201
THBD	0.947365
CD24	-0.949481
ZNF821	0.363492
MAL	-0.515632
CARD8	-0.378438
CETN3	-0.693744
REG1A	0.283678
MAD1L1	-0.285576
ADIRF	0.265201
SERPINB3	0.232495
FBP2	0.237597
EFNB2	0.20635
DPYSL2	-0.800388
IL1RL2	0.260441
FCMR	-1.01533
